# Supplementary material for: Metagenomic discovery and co-infection of diverse wobbly possum disease viruses and a novel hepacivirus in Australian brushtail possums
Source: PubMed Central journal article supplement (PMC7990097; doi:10.1186/s42522-019-0006-x), 2019-12-12
Supplement: 42522_2019_6_MOESM1_ESM.pdf [file 42522_2019_6_MOESM1_ESM.pdf]

**Table S1. PCR primers and qPCR primers for WPDV used in this study.**

| Targeted region                                                      | PCR assay        | Primer sequence (5'-3')   | Purpose                                        |
|----------------------------------------------------------------------|------------------|---------------------------|------------------------------------------------|
| WPDV replicase polyprotein                                           | WPDV_case_PCR1_F | TACACAACAGCAGTTAGTGG      | Initial WPDV case checking (available for AU1) |
|                                                                      | WPDV_case_PCR1_R | GTAAACTTCATTACACAAGAAGCC  |                                                |
| WPDV replicase polyprotein                                           | WPDV_case_PCR2_F | GACACCGGTTGAGTCAAC        | Initial WPDV case checking                     |
|                                                                      | WPDV_case_PCR2_R | ATTCCAAGGATCTCGCAAAG      |                                                |
| WPDV replicase polyprotein                                           | WPDV_case_PCR3_F | TAATCCGGTGAATGCCATTAC     | Initial WPDV case checking                     |
|                                                                      | WPDV_case_PCR3_R | CTATTACTACGACTGTCCGTG     |                                                |
| PCR1 (replicase polyprotein1ab) 471-4471                             | WPDV_AU1_PCR1_F  | CCTTATTGTGACTTTGACATGGATG | Genome recovery for WPDV AU1                   |
|                                                                      | WPDV_AU1_PCR1_R  | GAGAGCCAGTACCGTATGACC     |                                                |
| PCR 2 (replicase polyprotein1ab) 2916-7142                           | WPDV_AU1_PCR2_F  | GTGTCCTGTGCTTCAAGTGC      | Genome recovery for WPDV AU1                   |
|                                                                      | WPDV_AU1_PCR2_R  | ATCAACATCAGGAAGTGCTTGC    |                                                |
| PCR 3 (replicase polyprotein 1ab) 6614-9811                          | WPDV_AU1_PCR3_F  | CTTGCGTACTGTCGGGTATC      | Genome recovery for WPDV AU1                   |
|                                                                      | WPDV_AU1_PCR3_R  | GACAAGGACTGGTTACATGGTG    |                                                |
| PCR 4 (replicase polyprotein 1ab, glycoprotein 2,3 and 4) 8622-11643 | WPDV_AU1_PCR4_F  | GCATCCTCATCATACACTTGCG    | Genome recovery for WPDV AU1                   |
|                                                                      | WPDV_AU1_PCR4_R  | TCTGATGTCCAATATCCATAGTAGG |                                                |
| gap filling PCR 1 (replicase polyprotein 1ab) 1455-3074              | WPDV_AU1_G1_F    | CGGATGTGCTAGCTTTGTG       | Gap filling of WPDV AU1                        |
|                                                                      | WPDV_AU1_G1_R    | GTGTGACAACCTGCAATGC       |                                                |
| gap filling PCR 2 4300-6162                                          | WPDV_AU1_G2_F    | AAGGCTGCTTACGATTCAG       | Gap filling of WPDV AU1                        |
|                                                                      | WPDV_AU1_G2_R    | GAAGCTTCTCAACATCCTTG      |                                                |
| gap filling PCR 3                                                    | WPDV_AU1_G3_F    | GTGACCTCCTTATCAAATTGTG    | Gap filling of WPDV AU1                        |

|                                                                                   |                 |                                   |                                           |
|-----------------------------------------------------------------------------------|-----------------|-----------------------------------|-------------------------------------------|
| 7500-8776                                                                         | WPDV_AU1_G3_R   | GCAGTACTGGTAGAACTTGC              |                                           |
| gap filling PCR 4<br>9653-10679                                                   | WPDV_AU1_G4_F   | CGTTGTTACACCTCGCTC                | Gap filling of WPDV AU1                   |
|                                                                                   | WPDV_AU1_G4_R   | CAATGTATCTGAAATGAGTGCG            |                                           |
| PCR1 (replicase<br>polyprotein1ab)<br>476-4459                                    | WPDV_AU2_PCR1_F | CTCTGATTTTGACATTGATGAGACAG        | Genome recovery for<br>WPDV AU2           |
|                                                                                   | WPDV_AU2_PCR1_R | CATGAGTCCATCCTGAAGCAG             |                                           |
| PCR 2 (replicase<br>polyprotein1ab)<br>2847-7142                                  | WPDV_AU2_PCR2_F | TAGCAGTCTTCGCATCATTACC            | Genome recovery for<br>WPDV AU2           |
|                                                                                   | WPDV_AU2_PCR2_R | GTCAATGTTAGGTAGAGCTTGC            |                                           |
| PCR 3 (replicase<br>polyprotein 1ab)<br>6610-9809                                 | WPDV_AU2_PCR3_F | GTGGTCTTATGTGTGTTAACTAC<br>C      | Genome recovery for<br>WPDV AU2           |
|                                                                                   | WPDV_AU2_PCR3_R | CAAGGGCTAGTGACGTGATG              |                                           |
| PCR 4 (replicase<br>polyprotein 1ab,<br>glycoprotein 2,3<br>and 4) 8812-<br>11614 | WPDV_AU2_PCR4_F | CCAGAATCCACGTCACGCTC              | Genome recovery for<br>WPDV AU2           |
|                                                                                   | WPDV_AU2_PCR4_R | GCATATTCCAGGTCTATAAGTG<br>C       |                                           |
| gap filling PCR 1<br>(replicase<br>polyprotein 1ab)<br>1457-2981                  | WPDV_AU2_G1_F   | CTGTGCTAGCTTTGTCAGG               | Gap filling of WPDV AU2                   |
|                                                                                   | WPDV_AU2_G1_R   | CACGACGATGTTCTTCACC               |                                           |
| gap filling PCR 2<br>4300-6162                                                    | WPDV_AU2_G2_F   | CTTAAGGCTGCTTATGATTCAG            | Gap filling of WPDV AU2                   |
|                                                                                   | WPDV_AU2_G2_R   | GATTGCCTGTCTCAGTTTCTC             |                                           |
| gap filling PCR 3<br>7500-8776                                                    | WPDV_AU2_G3_F   | CAACCCTCTCTAATTGTGTATAC           | Gap filling of WPDV AU2                   |
|                                                                                   | WPDV_AU2_G3_R   | ACGTCCCATTGGTTGCAG                |                                           |
| gap filling PCR 4<br>9653-10679                                                   | WPDV_AU2_G4_F   | GTTGTCATCACGTCACTAGC              | Gap filling of WPDV AU2                   |
|                                                                                   | WPDV_AU2_G4_R   | TCAGCATTGCCGATCATC                |                                           |
| 3'UTR extension<br>PCR                                                            | WPDV_AU1_end_F  | GCCATCATCAAAGCAATAATTGA<br>CCTGGA | Recovery of 3'UTR for<br>WPDV AU1 and AU2 |
|                                                                                   | WPDV_AU2_end_F  | G TTCAGTGGAGGTATGGCAGCT<br>G      |                                           |
|                                                                                   | WPDV_end_UTR_R  | CACTATGCACGGACAGTCGTAG            |                                           |

|                                      |                       |                                                          |                                  |
|--------------------------------------|-----------------------|----------------------------------------------------------|----------------------------------|
| WPDV conserved RdRp catalytic domain | WPDV_qPCR_Pol_F       | CGCAYTGAGATTAAYTATCGAC<br>C                              | WPDV qPCR                        |
|                                      | WPDV_qPCR_Pol_R       | CAATCAGTRTGYAGTACCACG                                    |                                  |
|                                      | WPDV_qPCR_Pol_P       | /56-<br>FAM/TGGGTCCCA/ZEN/GCACT<br>HATTTATGGTGA/3IABkFQ/ |                                  |
| Hepacivirus Polyprotein 8643-6579    | Possum_hepaci_PCR 1_F | TCCAATTACCCAGCTTTGTG                                     | Initial hepacivirus confirmation |
|                                      | Possum_hepaci_PCR 1_R | GGTCTTCCACTCAGTCAGTAG                                    |                                  |
| Hepacivirus Polyprotein 8663-6618    | Possum_hepaci_PCR 2_F | GGTCTCACGTCTACTGGC                                       | Initial hepacivirus confirmation |
|                                      | Possum_hepaci_PCR 2_R | TACACCACGTACTTTCCCA                                      |                                  |
| Hepacivirus-polyprotein              | Possum_hepaci_PCR 3_F | GAGGCAATTGAATTTGACTGG                                    | Gap filling                      |
|                                      | Possum_hepaci_PCR 3_R | TGGAGTGACATGTCTATTGAC                                    |                                  |
| Hepacivirus-polyprotein              | Possum_hepaci_PCR 4_F | ACATCTGTGTTGATGATGGTG                                    | Gap filling                      |
|                                      | Possum_hepaci_PCR 4_R | ACAGATCACACAGGTAATGG                                     |                                  |
