# Supplementary material for: Metagenomic discovery and co-infection of diverse wobbly possum disease viruses and a novel hepacivirus in Australian brushtail possums
Source: PubMed Central journal article supplement (PMC7990097; doi:10.1186/s42522-019-0006-x), 2019-12-12
Supplement: 42522_2019_6_MOESM2_ESM.pdf [file 42522_2019_6_MOESM2_ESM.pdf]

**Table S2. Presentation and pathology of Wobbly Possum Disease in brushtail possums in Australia.** This table chronologically summarises the clinical signs and histological findings in brushtail possums considered to fit the syndrome description for Wobbly Possum Disease. Most possums originate from New South Wales on mainland Australia, except for those denoted with a "T" that originated in Tasmania.

| Case ID           | Date     | Signalment | Presentation                                 | Degree of Lymphoplasmacytic Inflammation |          |            |            |             |              |                 |                |
|-------------------|----------|------------|----------------------------------------------|------------------------------------------|----------|------------|------------|-------------|--------------|-----------------|----------------|
|                   |          |            |                                              | Meninges                                 | Cerebrum | Brain stem | Cerebellum | Optic Nerve | Ocular Globe | Retinal Atrophy | Liver / Kidney |
| D42               | Dec 1983 | M/Juv      |                                              | 2                                        | 2        | 2          | 1          | -           | -            | -               | 0/0            |
| D65               | 1986     | -/Ad       |                                              | 2                                        | 2        | 3          | 1 N2       | -           | -            | -               | -/-            |
| D98 <sup>T</sup>  | Nov 1985 | -/-        |                                              | 1                                        | 2        | 2          | 1          | -           | -            | -               | 3/3            |
| D123              | Oct 1987 | F/Ad       |                                              | 2                                        | 2        | 2          | 2 N3       | -           | -            | -               | 0/0            |
| D198              | Jul 1989 | F/Ad       | Blind, dilated pupils, euthanised            | 4                                        | 2        | 2          | 3 N4       | -           | 1            | 0               | 0/0            |
| D228              | Apr 1990 | F/Ad       | Depression, euthanised                       | 1                                        | 1        | -          | 1 N2       | -           | -            | -               | 0/-            |
| D229              | May 1990 | F/Ad       | Depression, poor response to stimuli         | 3                                        | 4        | 2          | 1          | -           | -            | -               | 0/0            |
| D237              | May 1990 | F/Ad       | Blind, euthanised                            | 3                                        | 3        | 3          | 2 N1       | 1           | 0            | 3               | -/-            |
| D273 <sup>T</sup> | 1985     | -/-        | Emaciation                                   | 2                                        | 2        | 1          | 0          | -           | -            | -               | 2/2            |
| D275              | May 1991 | M/Ad       | Blind, euthanised                            | 3                                        | 3 N1     | 2          | -          | 3           | 2            | 0               | -/-            |
| D284              | May 1991 | -/-        | Blind, euthanised                            | 2                                        | 2        | 2          | 2          | 2           | 2            | 4               | -/-            |
| D285              | May 1991 | -/-        | Blind, euthanised                            | 2                                        | 1        | 1          | 1 N3       | -           | -            | -               | -/-            |
| D292              | Nov 1991 | F/Ad       | Blind, euthanised                            | 2                                        | 1        | 0          | 0          | 2           | 2            | 4               | 0/-            |
| D293              | Nov 1991 | F/Ad       | Blind                                        | 4                                        | 2        | 3          | 2          | 0           | 0            | 2               | -/-            |
| D294              | Nov 1991 | F/Ad       | Blind, leg injury                            | 1                                        | 2        | 2          | 1 N4       | 3           | 2            | 3               | -/-            |
| D305              | Mar 1992 | F/Ad       | Blind several months, euthanised             | 4                                        | 4        | 4          | -          | -           | -            | -               | 0/-            |
| D308              | Mar 1992 | F/Ad       | Unilateral blindness, strabismus, euthanised | 2                                        | 2        | 1          | 1 N3       | -           | -            | -               | 1/-            |
| D310              | Feb 1992 | F/Ad       | Thin, rapid respiration                      | 3                                        | 2        | 3          | 3 N3       | 1           | 1            | 4               | 0/0            |
| D326              | Jul 1992 | F/Ad       | Blind, ataxic, euthanised                    | 3                                        | 2        | 1          | 2          | -           | -            | -               | 1/-            |
| D340              | Aug 1992 | F/Ad       | Blind, ataxic                                | 2                                        | 1        | 1          | 1          | 1           | 0            | 2               | -/-            |
| D365              | Aug 1993 | M/Ad       | Blind                                        | 1                                        | 0        | 1          | 1          | 0           | 0            | 3               | 0/0            |
| D372              | Oct 1993 | F/Ad       | Blind, depressed, poor response to stimuli   | 5                                        | 4        | 4          | 2 N3       | 0           | 0            | 2               | -/-            |

|                       |           |       |                                                                   |   |      |      |      |   |   |   |       |
|-----------------------|-----------|-------|-------------------------------------------------------------------|---|------|------|------|---|---|---|-------|
| D375                  | 1993      | F/Juv | Blind, paralysis                                                  | 2 | 1    | 1    | 1    | - | 0 | 4 | -/-   |
| D500                  | 1997      | F/Ad  | Ataxic                                                            | 1 | 0    | 0    | 1 N2 | 1 | 0 | 0 | 1/1   |
| D503                  | 1997      | F/Ad  | Blind                                                             | 3 | 3    | 2    | 4    | 0 | 0 | 4 | 0/0   |
| D541                  | 1998      | F/Ad  | Blind, anisocoria, euthanised                                     | 3 | 3    | 3    | 3    | 4 | 4 | 4 | 0/0   |
| D546                  | 1998      | F/Ad  | Blind, thin, euthanised                                           | 4 | 3    | 3    | 3    | 1 | 2 | 1 | 0/0   |
| 1411.1                | Mar 1993  | F/Ad  | Blind, progressive ataxia, weight loss, euthanised after 4 months | 2 | 2 N2 | 2    | 1    | 1 | 0 | 4 | 0/0   |
| 1834.1                | Aug 2000  | F/Ad  | Blind, euthanised after 6 weeks                                   | 3 | 2 N1 | 2    | 1    | 1 | 0 | 4 | 1g/1  |
| 2545.1                | Nov 2001  | M/Ad  | Blind, nystagmus, thin, euthanised                                | 1 | 1    | 1 N1 | 1    | - | - | - | 0/0   |
| 2723.1                | Mar 2002  | F/Ad  | Blind, euthanised                                                 | 0 | 0    | 0    | 0    | 0 | 2 | 1 | 1/-   |
| 2905.1                | June 2002 | F/Ad  | Blind, euthanised                                                 | 2 | 2    | 2    | 1    | 1 | 0 | 1 | 0/0   |
| 3046.1                | Aug 2002  | M/Ad  | Blind, circling, ataxic, euthanised                               | 2 | 1    | 2    | 1    | 2 | 3 | 4 | 0/0   |
| 3501.1                | Apr 2003  | M/Ad  | Blind, knuckling, thin, euthanised                                | 2 | 1    | 2    | 1    | 1 | 1 | 3 | 0/0   |
| 3619.1                | Jul 2003  | F/Ad  | Blind, head low, slow, euthanised                                 | 2 | 1    | 2    | 2    | 3 | 0 | 4 | 1/1   |
| 4182.1                | Jun 2004  | F/Ad  | Blind, ataxic, thin, euthanised                                   | 3 | 2    | 2    | 2    | - | 0 | 0 | 0/0   |
| 4231.1                | Jul 2004  | M/Ad  | Circling, hit by car, euthanised                                  | 2 | 1    | 2    | 1    | - | 2 | 2 | 0/0   |
| 4601.1                | Mar 2005  | F/Ad  | Blind, ataxic, thin, diarrhoea, euthanised                        | 3 | 3    | 3    | 3 N2 | - | - | - | 0/0   |
| 5263.1                | Jun 2006  | F/Ad  | Blind, circling, euthanised                                       | 2 | 3    | 2    | 2    | - | 0 | 3 | 0/0   |
| 6950.1                | May 2009  | M/Ad  | Blind, depressed, penetrating wound, euthanised                   | 2 | 2    | 2    | 1 N1 | - | 2 | 1 | 2**/1 |
| 6872.1                | Mar 2009  | F/Ad  | Blind, thin, docile, euthanised                                   | 2 | 3    | 3    | 3    | 2 | 2 | 3 | 0/0   |
| 7635.1                | Jun 2010  | F/Ad  | Blind, thin, euthanised                                           | 3 | 0    | 0    | 0    | 2 | 0 | 0 | 0/0   |
| 8554.1                | Apr 2012  | F/Ad  | Blind, euthanasia                                                 | 3 | 3 N2 | 3 N1 | 3 N1 | 2 | 2 | 0 | 0/1   |
| 8708.1                | Jun 2012  | M/Ad  | Gaspings, agonal, euthanised                                      | 2 | 3    | 2    | 2    | - | - | - | 0/0   |
| 8694.1                | Jun 2012  | F/Ad  | Blind, ataxic, dead pouch young, euthanised                       | 3 | 2    | 2    | 2    | 0 | 1 | 0 | 0/0   |
| 10282.1 <sup>T</sup>  | Dec 2014  | F/Ad  | Ataxic, euthanised                                                | 2 | 1    | 1    | 1    | - | - | - | 2/2   |
| 10282.2 <sup>T</sup>  | Dec 2014  | F/Ad  | Ataxic, euthanised                                                | 1 | 2    | 2    | 2    | - | - | - | 3/3   |
| 10282.2b <sup>T</sup> | Dec 2014  | -/Juv | Euthanised with dam                                               | 1 | 2    | 2    | 2    | - | - | - | 2/3   |
| 10602.1               | Jun 2015  | F/Ad  | Unresponsive, euthanised                                          | 1 | 1    | 1    | 1    | 1 | 0 | 0 | 1/0   |

All cases originate from NSW except Tasmanian cases that are denoted with a<sup>T</sup>  
F- Female, M- Male, Ad – Adult, Juv - Juvenile

Non-suppurative inflammation graded on a scale of 0-4 in ascending severity. Necrosis signified by N and graded on a scale of 0-4 in ascending severity. – No sample.  
<sup>g</sup>- granulomatous inflammation. \*\* associated with a penetrating foreign body.
